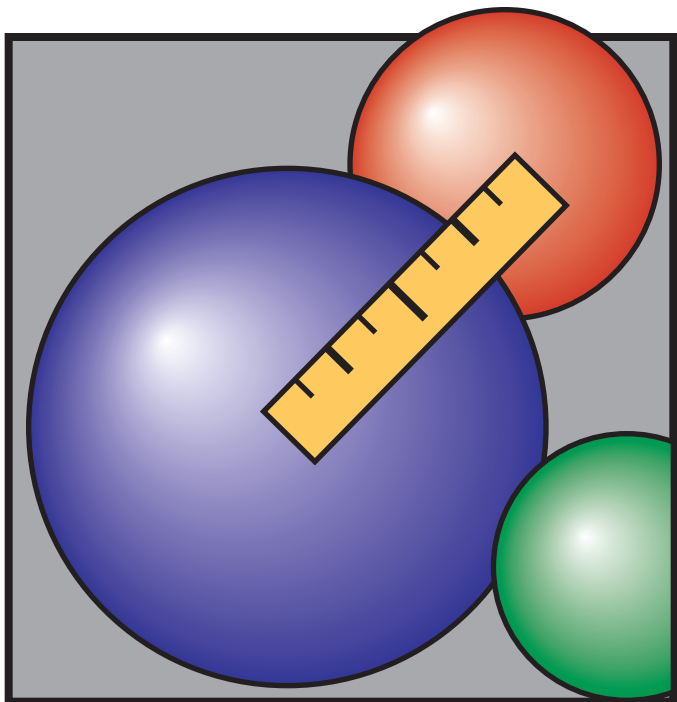

Source: https://gsw.silverchair-cdn.com/gsw/Content_public/Journal/geosphere/7/3/10.1130_GES00631.1/3/supplement_1715800_GS631_Reduce3D.zip
